# Supplementary material for: Efficacy and safety of tacrolimus treatment for neuromyelitis optica spectrum disorder
Source: PubMed Central journal article supplement (PMC5429791; doi:10.1038/s41598-017-00860-y), 2017-04-11
Supplement: 41598_2017_860_MOESM1_ESM.pdf [file 41598_2017_860_MOESM1_ESM.pdf]

# **Efficacy and safety of tacrolimus treatment for neuromyelitis optica spectrum disorder**

Bo Chen<sup>1</sup>, Qian Wu<sup>1</sup>, Gaotan Ke<sup>2</sup>, Bitao Bu<sup>1,\*</sup>

<sup>1</sup>Department of Neurology, Tongji Hospital of Tongji Medical College, Huazhong University of Science and Technology, Wuhan, Hubei, China

<sup>2</sup>Department of Radiology, Tongji Hospital of Tongji Medical College, Huazhong University of Science and Technology, Wuhan, Hubei, China

\*Correspondence and requests for materials should be addressed to B. T. B. ([bubitao@tjh.tjmu.edu.cn](mailto:bubitao@tjh.tjmu.edu.cn))

| Patients | Gender | Onset age | Attack points (patients were prescribed tacrolimus at time 0, relapse after tacrolimus was marked by red) | Total number of attacks | Number of attacks before tacrolimus treatment | Number of attacks after tacrolimus treatment | ARR before tacrolimus | ARR after tacrolimus | EDSS before tacrolimus | EDSS after tacrolimus | AQP4-ab titer in serum |
|----------|--------|-----------|-----------------------------------------------------------------------------------------------------------|-------------------------|-----------------------------------------------|----------------------------------------------|-----------------------|----------------------|------------------------|-----------------------|------------------------|
| 25       | F      | 55        | -13,-2,0,34                                                                                               | 3                       | 3                                             | 0                                            | 2.77                  | 0.00                 | 5                      | 3                     | 1:32                   |
| 24       | F      | 30        | -3,6,32                                                                                                   | 3                       | 1                                             | 2                                            | 4.00                  | 0.75                 | 9                      | 3                     | 1:320                  |
| 23       | F      | 19        | -42,-11,27                                                                                                | 2                       | 2                                             | 0                                            | 0.57                  | 0.00                 | 4                      | 3                     | 1:100                  |
| 22       | F      | 6         | -38,-15,-8,0,25                                                                                           | 4                       | 4                                             | 0                                            | 1.26                  | 0.00                 | 3                      | 0                     | 1:32                   |
| 21       | F      | 22        | -3,17                                                                                                     | 1                       | 1                                             | 0                                            | 4.00                  | 0.00                 | 6                      | 1                     | 1:32                   |
| 20       | F      | 22        | -31,-23,-18,-15,-11,-7,-5,-3,-1,7,13,15                                                                   | 11                      | 9                                             | 2                                            | 3.48                  | 1.60                 | 3                      | 3                     | 1:10                   |
| 19       | F      | 21        | -4,-1,14                                                                                                  | 2                       | 2                                             | 0                                            | 6.00                  | 0.00                 | 4                      | 0                     | 1:32                   |
| 18       | F      | 50        | -17,-1,14                                                                                                 | 2                       | 2                                             | 0                                            | 1.41                  | 0.00                 | 4                      | 3                     | 1:32                   |
| 17       | F      | 51        | -17,-14,-3,0,13                                                                                           | 4                       | 4                                             | 0                                            | 2.82                  | 0.00                 | 6                      | 1                     | 1:32                   |
| 16       | M      | 47        | -31,-24,-13,-1,13                                                                                         | 4                       | 4                                             | 0                                            | 1.55                  | 0.00                 | 4                      | 2                     | 1:10                   |
| 15       | F      | 16        | -28,-25,-16,0,12                                                                                          | 4                       | 4                                             | 0                                            | 1.71                  | 0.00                 | 6                      | 4                     | 0                      |
| 14       | F      | 48        | -19,-1,4,12                                                                                               | 3                       | 2                                             | 1                                            | 1.57                  | 1.00                 | 3                      | 3                     | 1:64                   |
| 13       | F      | 35        | -5,-1,11                                                                                                  | 3                       | 2                                             | 1                                            | 4.80                  | 1.09                 | 4                      | 3                     | 0                      |
| 12       | F      | 40        | -3,10                                                                                                     | 1                       | 1                                             | 0                                            | 4.00                  | 0.00                 | 3                      | 3                     | 1:64                   |
| 11       | F      | 41        | -24,-20,-16,-8,-1,10                                                                                      | 5                       | 5                                             | 0                                            | 2.50                  | 0.00                 | 3                      | 1                     | 1:100                  |
| 10       | F      | 23        | -44,-20,-12,-1,9                                                                                          | 4                       | 4                                             | 0                                            | 1.09                  | 0.00                 | 6.5                    | 1.5                   | 1:10                   |
| 9        | F      | 50        | -4,-2,9                                                                                                   | 2                       | 2                                             | 0                                            | 6.00                  | 0.00                 | 2                      | 1                     | 1:100                  |
| 8        | F      | 40        | -3,8                                                                                                      | 1                       | 1                                             | 0                                            | 4.00                  | 0.00                 | 7                      | 1                     | 1:100                  |
| 7        | F      | 36        | -24,-18,-8,0,3,8                                                                                          | 5                       | 4                                             | 1                                            | 2.00                  | 1.50                 | 3                      | 3                     | 1:100                  |
| 6        | M      | 31        | -17,-2,7                                                                                                  | 2                       | 2                                             | 0                                            | 1.41                  | 0.00                 | 3                      | 1                     | 1:32                   |
| 5        | F      | 19        | 23,0,7                                                                                                    | 9                       | 8                                             | 1                                            | 1.52                  | 1.71                 | 4.5                    | 10                    | 1:100                  |
| 4        | F      | 22        | -2,7                                                                                                      | 1                       | 1                                             | 0                                            | 6.00                  | 0.00                 | 3                      | 0                     | 0                      |
| 3        | F      | 17        | -99,-15,-11,0,5,6                                                                                         | 5                       | 4                                             | 1                                            | 0.48                  | 2.00                 | 5                      | 3                     | 1:64                   |
| 2        | F      | 49        | -5,6                                                                                                      | 1                       | 1                                             | 0                                            | 2.40                  | 0.00                 | 7.5                    | 3                     | 1:10                   |
| 1        | F      | 22        | -2,6                                                                                                      | 1                       | 1                                             | 0                                            | 6.00                  | 0.00                 | 5                      | 2                     | 1:320                  |

| Patients | Dose of prednisone (6 months later)/mg | Time points of last follow-up (black) or first relapse after tacrolimus (red) | Previous therapy | Dose of tacrolimus/mg | Follow-up     | Abbreviations                              |
|----------|----------------------------------------|-------------------------------------------------------------------------------|------------------|-----------------------|---------------|--------------------------------------------|
| 25       | 0                                      | 34                                                                            |                  | 2                     |               | <b>ARR:</b> annualized relapse rate        |
| 24       | 0                                      | 6                                                                             |                  | 3                     |               | <b>EDSS:</b> Expanded Disability Severity  |
| 23       | 7.5                                    | 27                                                                            |                  | 2.5                   |               | <b>CTX:</b> cyclophosphamide               |
| 22       | 5                                      | 25                                                                            |                  | 1                     |               | <b>PE:</b> Plasmapheresis                  |
| 21       | 0                                      | 17                                                                            | CTX*5d           | 3                     |               | <b>AZA:</b> azathioprine                   |
| 20       | 10                                     | 7                                                                             | PE*3             | 3                     | herpes zoster | <b>MMF:</b> mycophenolate mofetil          |
| 19       | 10                                     | 14                                                                            |                  | 3                     |               | <b>IF:</b> interferon-beta                 |
| 18       | 0                                      | 14                                                                            |                  | 2                     |               | <b>IVIG:</b> intravenous immunoglobulins G |
| 17       | 10                                     | 13                                                                            | AZA*1m,          | 2                     |               | <b>d:</b> day                              |
| 16       | 0                                      | 13                                                                            |                  | 3                     |               | <b>m:</b> month                            |
| 15       | 0                                      | 12                                                                            | IF*10m           | 2                     |               |                                            |
| 14       | 15                                     | 4                                                                             | IVIG*5d          | 2                     |               |                                            |
| 13       | 5                                      | 11                                                                            |                  | 3                     |               |                                            |
| 12       | 0                                      | 10                                                                            |                  | 2                     |               |                                            |
| 11       | 0                                      | 10                                                                            | PE*3             | 3                     |               |                                            |
| 10       | 10                                     | 9                                                                             | AZA*18m, 2       | 3                     | rash          |                                            |
| 9        | 10                                     | 9                                                                             |                  | 3                     |               |                                            |
| 8        | 10                                     | 8                                                                             | AZA*2m,          | 2                     | hand tremor   |                                            |
| 7        | 15                                     | 3                                                                             |                  | 3                     |               |                                            |
| 6        | 0                                      | 7                                                                             |                  | 3                     |               |                                            |
| 5        | 0                                      | 7                                                                             | MMF*26M, 2       | 3                     | death         |                                            |
| 4        | 7.5                                    | 7                                                                             |                  | 3                     |               |                                            |
| 3        | 20                                     | 5                                                                             | IVIG*5d          | 3                     |               |                                            |
| 2        | 10                                     | 6                                                                             |                  | 3                     |               |                                            |
| 1        | 10                                     | 6                                                                             |                  | 3                     |               |                                            |
